# Supplementary material for: A foolproof method for phase transfer of metal nanoparticles via centrifugation
Source: Royal Society of Chemistry journal article supplement (doi:10.1039/c5cc09344a), 2015-11-24
Supplement: c5cc09344a1.pdf [file c5cc09344a1.pdf]

## Electronic Supplementary Information

A foolproof method for phase transfer of metal nanoparticles via centrifugation

Jin Ock Park<sup>a, b</sup>, So-Hye Cho<sup>b, c</sup>, Jae Seung Lee<sup>a</sup>, Wonjoo. Lee<sup>d\*</sup>, Seung Yong Lee<sup>b, c\*</sup>

### **Contents**

1. TEM images of all the particles before/after phase transfer
2. UV-vis spectra of all the particles before/after phase transfer

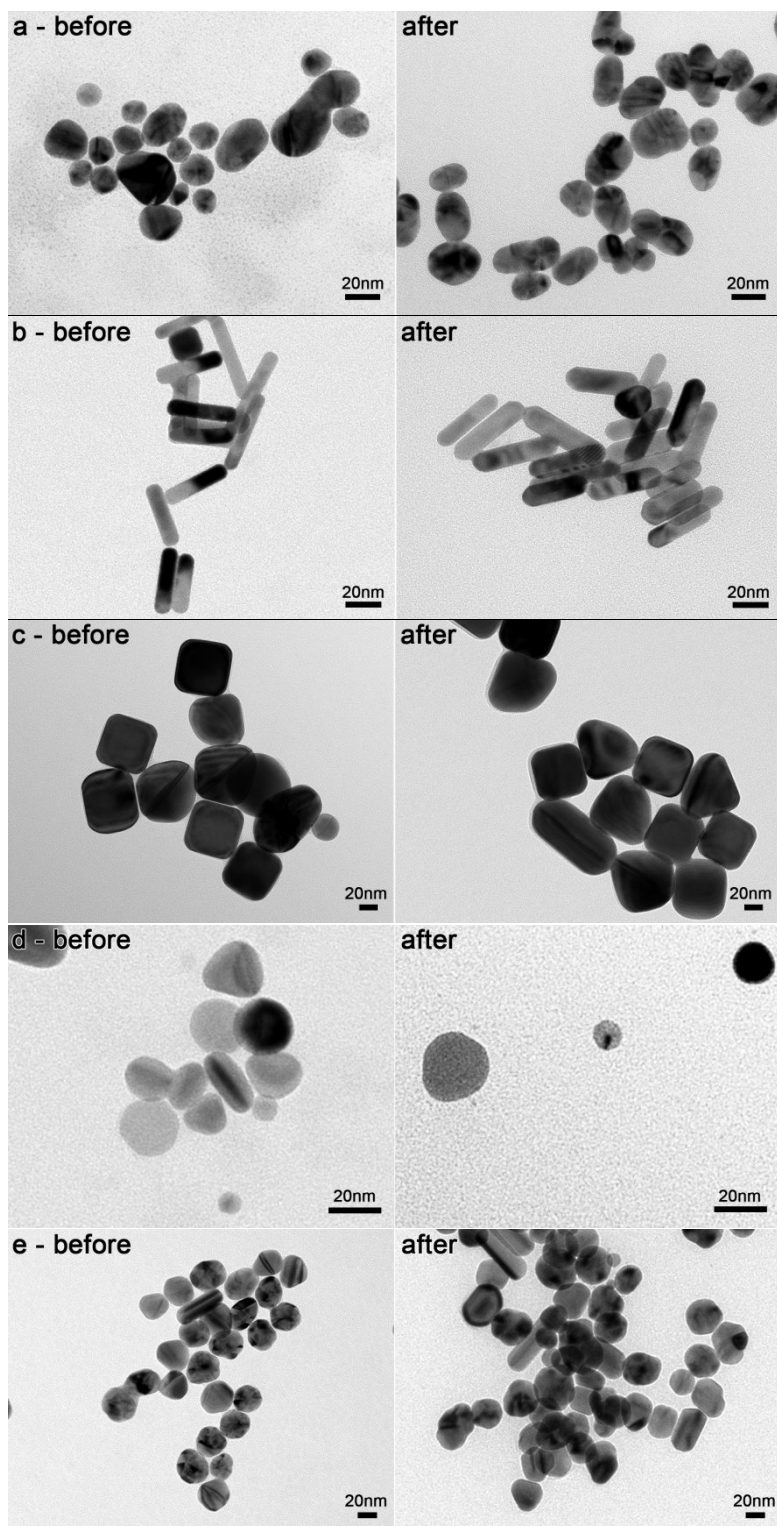

**Figure S1.** TEM images of a) AuNSs, b) AuNRs, c) AuNCs, d) small and e) large AgNSs,

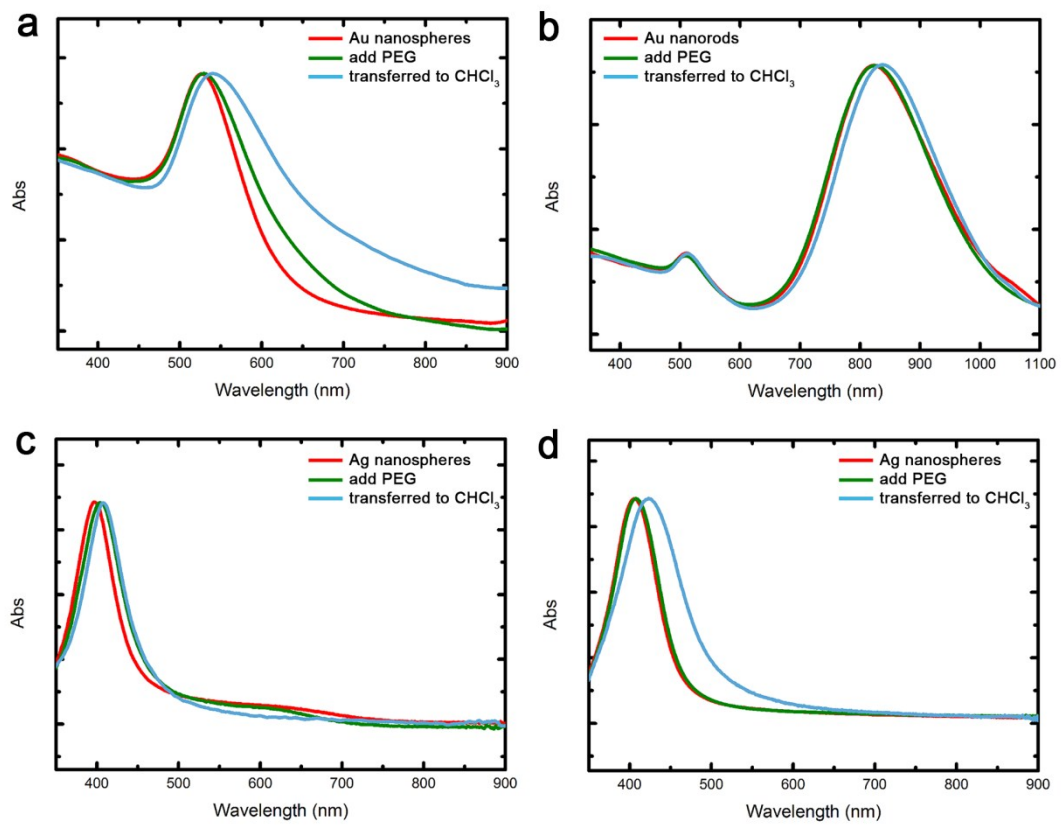

**Figure S1.** TEM images of a) AuNSs, b) AuNRs, c) small and d) large AgNSs,
